# Supplementary material for: Separation of nuclear isomers for cancer therapeutic radionuclides based on nuclear decay after-effects
Source: Sci Rep. 2017 Mar 13;7:44242. doi: 10.1038/srep44242 (PMC5347157; doi:10.1038/srep44242)
Supplement: Supplementary Information [file srep44242-s1.pdf]

# Supplementary information

## **Separation of nuclear isomers for cancer therapeutic radionuclides based on nuclear decay after-effects**

R. Bhardwaj<sup>1,2</sup>, A. van der Meer<sup>1</sup>, S.K. Das<sup>1</sup>, M. de Bruin<sup>1</sup>, J. Gascon<sup>2</sup>, H. T. Wolterbeek<sup>1</sup>, A. G. Denkova<sup>1</sup> and P. Serra-Crespo<sup>1,\*</sup>

<sup>1</sup>Radiation and Isotopes for Health, Radiation Science and Technology, Faculty of Applied Sciences, Technical University Delft, Mekelweg 15, 2629 JB, Delft, The Netherlands

<sup>2</sup>Catalysis Engineering, Chemical Engineering, Faculty of Applied Sciences, Delft University of Technology, Van der Maasweg 9, 2629 HZ, Delft, The Netherlands

### S1: Efficiency of the $^{177m}\text{Lu}/^{177}\text{Lu}$ generator

The efficiency of  $^{177m}\text{Lu}/^{177}\text{Lu}$  generator is defined as the ratio of the collected  $^{177}\text{Lu}$  activity divided by the theoretically produced  $^{177}\text{Lu}$  activity.

Theoretical production in time  $t$  is estimated by using the equation;

$$\text{efficiency}(\%) = \frac{A_g^t (\text{collected})}{A_m^0 \cdot \left( \frac{\lambda_g}{\lambda_g - \lambda_m} \right) \cdot [\exp^{-\lambda_m \cdot t} - \exp^{-\lambda_g \cdot t}] \cdot B.R \cdot P.I.C.} \cdot 100$$

where  $A_m^0$  = Initial activity of  $^{177m}\text{Lu}$  before elution,

$\lambda_g, \lambda_m$  = decay constants of  $^{177}\text{Lu}$ ,  $^{177m}\text{Lu}$  respectively,

$A_g^t$  = collected activity of  $^{177}\text{Lu}$  at time  $t$ ,

B.R = branching ratio for  $^{177m}\text{Lu}$  to  $^{177}\text{Lu}$  decay, 21.4% [1],

P.I.C = probability of internal conversion,  $\frac{\alpha}{1+\alpha}$ , 96.8%

where  $\alpha$  is known as the internal conversion coefficient, and is defined as;

$$\alpha = \frac{\text{number of de - excitations by the release of conversion electrons}}{\text{number of de - excitations via gamma ray emission}}$$

Hence, we define the probability of the decay following the internal conversion path as,  $P.I.C = \frac{\alpha}{1+\alpha}$ .

The 116KeV transition involved in the decay of  $^{177m}\text{Lu}$  to  $^{177}\text{Lu}$  has a theoretical internal conversion coefficient value,  $\alpha_{th} = 30.7$  [2, 3]. Thus the P.I.C value is calculated to be 96.8%.

### S2: Efficiency plots, while having a continuous flow of mobile phase:

As mentioned before, for each flow rate and temperature six to ten measurements were done and their average along with the standard deviation are plotted in figure S2.1

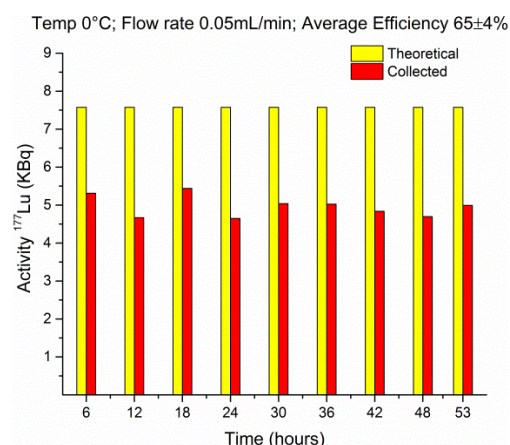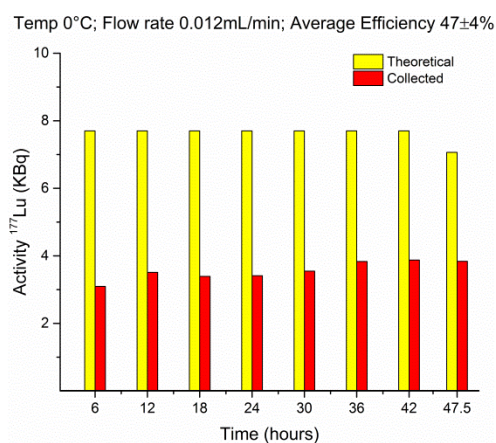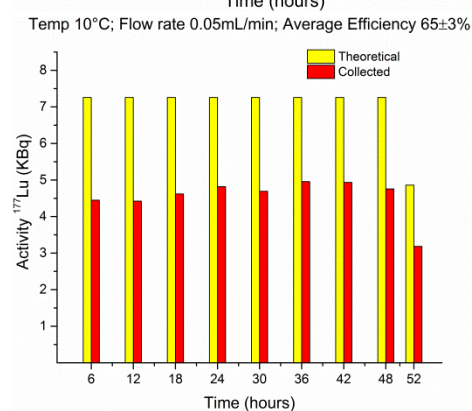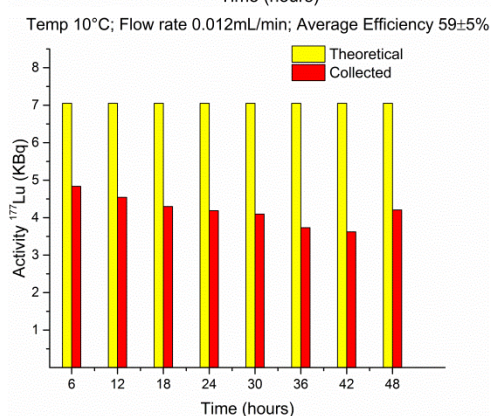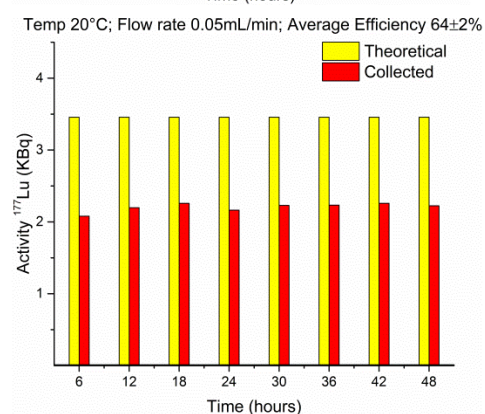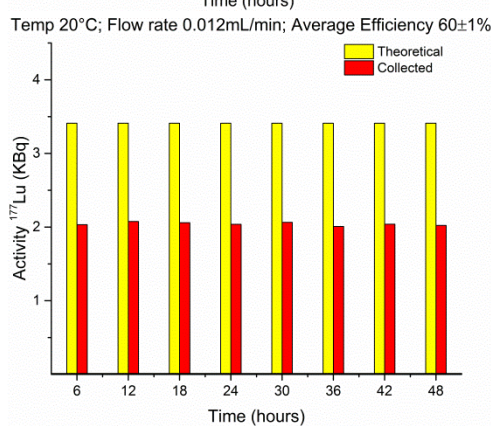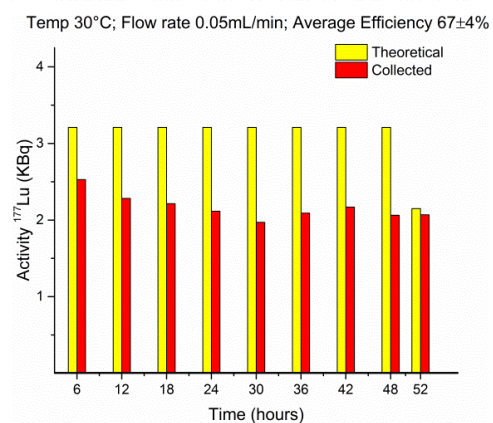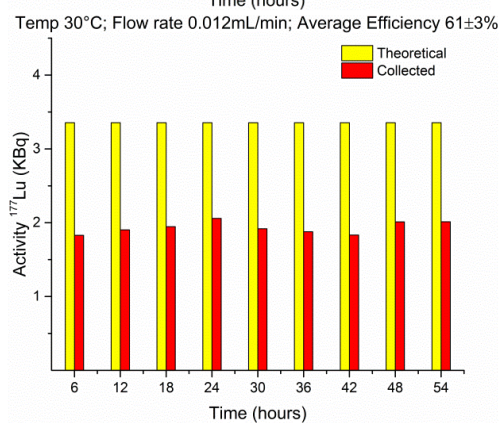

Figure.S1: Efficiency of accumulation at different temperature and flow rates

### S3: Ratios obtained in different fractions

Table S1: Ratios obtained at different temperatures, and flow rates

| Fraction number | Activity Ratio ( $^{177}\text{Lu}/^{177\text{m}}\text{Lu}$ ) |              |             |              |             |              |             |              |
|-----------------|--------------------------------------------------------------|--------------|-------------|--------------|-------------|--------------|-------------|--------------|
|                 | at 0°C                                                       |              | at 10°C     |              | at 20°C     |              | at 30°C     |              |
|                 | 0.05 mL/min                                                  | 0.012 mL/min | 0.05 mL/min | 0.012 mL/min | 0.05 mL/min | 0.012 mL/min | 0.05 mL/min | 0.012 mL/min |
| 1               | 160                                                          | 134          | 174         | 213          | 147         | 198          | 21          | 56           |
| 2               | 147                                                          | 131          | 184         | 211          | 141         | 206          | 23          | 51           |
| 3               | 132                                                          | 135          | 166         | 216          | 145         | 181          | 24          | 55           |
| 4               | 168                                                          | 136          | 168         | 209          | 126         | 198          | 30          | 52           |
| 5               | 140                                                          | 146          | 183         | 223          | 139         | 190          | 26          | 58           |
| 6               | 171                                                          | 158          | 187         | 238          | 106         | 185          | 23          | 59           |
| 7               | 194                                                          | 161          | 179         |              | 111         | 190          | 25          | 58           |
| 8               | 160                                                          |              |             |              | 111         |              | 26          | 51           |
| 9               | 178                                                          |              |             |              | 126         |              |             |              |
| 10              | 170                                                          |              |             |              | 128         |              |             |              |
| Avg±STD         | 162±12                                                       | 143±12       | 177±8       | 218±11       | 126±14      | 192±8        | 25±3        | 55±3         |

### S4: Optimisation of elution flux and elution times for accumulation experiments

To optimize the elution flow rate and elution times, we did different accumulations and then different flow rates are used to elute the accumulated activity. The results obtained are summarized below:

Table S2: Optimisation of elution time, elution flux for accumulation experiments

| Elution Flux (mL/min) | Elution Time (min) | Elution efficiency | Remark                                                                                                                                                           |
|-----------------------|--------------------|--------------------|------------------------------------------------------------------------------------------------------------------------------------------------------------------|
| 0.012                 | 120                | About 12%          | -                                                                                                                                                                |
| 0.1                   | 60                 | > 60%              | -                                                                                                                                                                |
| 0.5                   | 60                 | > 100%             | More than 100% efficiencies and very poor $^{177}\text{Lu}/^{177\text{m}}\text{Lu}$ ratios (less than 1), indicates the displacement of complex from the column. |

Further, to minimize the volume of eluted activity and to keep the dilution of eluted activity as low as possible. We studied elution profile of Lu-177 after accumulation for an hour while taking the fractions every 5 mins. The result are shown in the plot Figure S4.2. As seen from the plot, a trailing behaviour in the elution of Lu-177 is observed. After elution for about 60 minutes, 60% of the accumulated activity could be removed. Therefore we decided to do the elution of accumulated activity at 0.1 mL/min for 60 minutes.

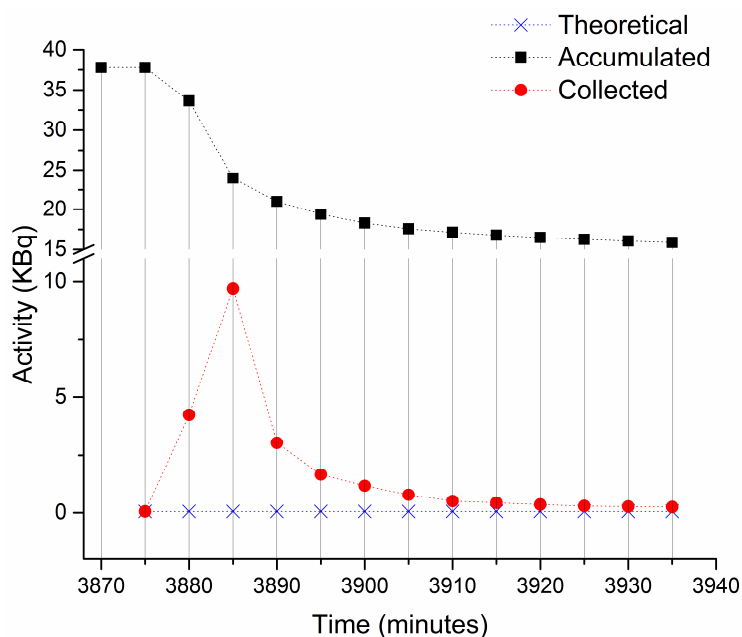

Figure S2. Optimization of elution time while eluting the accumulated activity at 0.1 mL/min.

### S5. Detailed results from accumulation experiments.

For accumulation experiments, we were mainly interested in knowing if the separation of the isomers is possible for different accumulation periods. As shown in the Figure 4 of main text, the activity ratios and efficiencies follow almost a constant behaviour, with no substantial change at a particular temp. There was no big deviation from separation, and even under no mobile phase flow for time period upto 5 days the system was capable to separate the two isomers.

Therefore we didn't took many reading for a same experimental point. We did repeat some of these observations twice which gave quite consistent data, the results are shown in the table below

Table S3:  $^{177}\text{Lu}/^{177\text{m}}\text{Lu}$  ratio and efficiency obtained for different accumulation periods at 10, 20 and 30°C

| Accumulation time | Fraction number | 10°C  |            | 20°C  |            | 30°C  |            |
|-------------------|-----------------|-------|------------|-------|------------|-------|------------|
|                   |                 | Ratio | Efficiency | Ratio | Efficiency | Ratio | Efficiency |
| 1 day             | 1               | 242   | 56         | 177   | 11         | 96    | 60         |
|                   | 2               | 200   | 50         | -     | -          | 67    | 53         |
|                   | Average         | 221   | 53         | -     | -          | 82    | 56         |
|                   | STDEV           | 29    | 4          | -     | -          | 21    | 5          |
| 2 day             | 1               | 228   | 52         | 191   | 49         | 99    | 59         |
|                   | 2               | -     | -          | 240   | 47         | 83    | 56         |
|                   | Average         | -     | -          | 216   | 48         | 91    | 57         |
|                   | STDEV           | -     | -          | 35    | 1          | 11    | 2          |
| 3 day             | 1               | 198   | 51         | 126   | 43         | 134   | 49         |
|                   | 2               | -     | -          | 188   | 53         | -     | -          |
|                   | Average         | -     | -          | 156   | 48         | -     | -          |
|                   | STDEV           | -     | -          | 44    | 7          | -     | -          |
| 4 day             | 1               | 237   | 15         | 210   | 50         | 150   | 46         |
|                   | -               | -     | -          | -     | -          | 190   | 44         |
|                   | Average         | -     | -          | -     | -          | 170   | 45         |
|                   | STDEV           | -     | -          | -     | -          | 28    | 2          |
| 5 day             | 1               | 251   | 41         | 179   | 45         | 126   | 46         |

## S6. Summary of the continuous and accumulation experiments;

For a better understanding of the data presented in Figure 3 and Figure 4, the results are summarized in table 2 and 3 below:

### *For continuous flow of mobile phase*

Table S4: Summary of the  $^{177}\text{Lu}/^{177\text{m}}\text{Lu}$  activity ratios and efficiency obtained under continuous elution mode at 0, 10, 20, and 30°C

| Temperature/ °C | $^{177}\text{Lu}/^{177\text{m}}\text{Lu}$ activity ratio |              | Efficiency (%) |              |
|-----------------|----------------------------------------------------------|--------------|----------------|--------------|
|                 | 0.012 mL/ min                                            | 0.05 mL/ min | 0.012 mL/ min  | 0.05 mL/ min |
| 0               | 142 ± 12                                                 | 162 ± 11     | 47 ± 4         | 65 ± 4       |
| 10              | 218 ± 11                                                 | 177 ± 8      | 60 ± 5         | 65 ± 3       |
| 20              | 192 ± 8                                                  | 119 ± 11     | 60 ± 1         | 64 ± 2       |
| 30              | 55 ± 3                                                   | 25 ± 3       | 61 ± 3         | 67 ± 4       |

### *For accumulation and elution experiments*

Table S5: Summary of the  $^{177}\text{Lu}/^{177\text{m}}\text{Lu}$  activity ratios and efficiency obtained under accumulation elution mode at 10, 20, and 30°C for an accumulation period of 1, 2, 3, 4, 5 days.

| Accumulation time/ day | $^{177}\text{Lu}/^{177\text{m}}\text{Lu}$ activity ratio |          |         | Efficiency (%) |      |      |
|------------------------|----------------------------------------------------------|----------|---------|----------------|------|------|
|                        | 10°C                                                     | 20°C     | 30°C    | 10°C           | 20°C | 30°C |
| 1                      | 242 ± 20                                                 | 177 ± 11 | 96 ± 8  | 56             | 50   | 53   |
| 2                      | 229 ± 15                                                 | 191 ± 12 | 99 ± 4  | 52             | 49   | 56   |
| 3                      | 198 ± 20                                                 | 125 ± 3  | 134 ± 6 | 50             | 54   | 47   |
| 4                      | 237 ± 15                                                 | 210 ± 16 | 150 ± 6 | 51             | 47   | 44   |
| 5                      | 251 ± 12                                                 | 178 ± 17 | 126 ± 5 | 43             | 44   | 48   |

## S7. Determination of void volume of the column and linear velocities

After filling the column with stationary phase, tC-18 silica, we determined the void volume of the column in order to have an idea about the linear velocities of the mobile phase through the column. The experiment set up involved for determining the void volume of the column is shown in Figure 3. A peek column with dimensions diameter 3 mm and length 47 mm is filled with tC-18 silica. The column is connected with an injector, UV cell and a fraction collector using tubings of known volume (a,b,c).

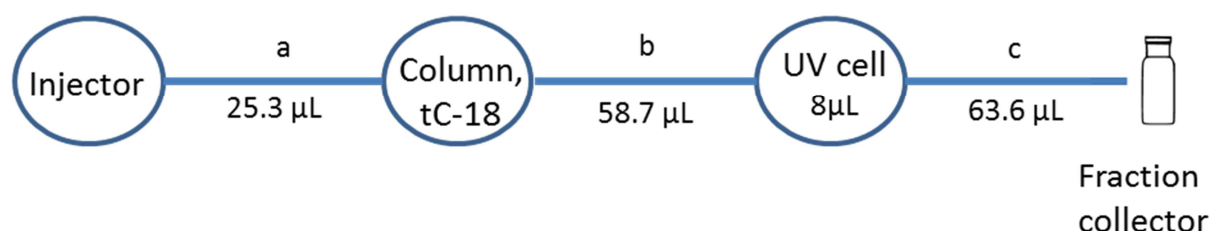

Figure S3. Experimental setup for void volume determination.

1 M  $\text{NaNO}_3$  is then used as a marker to determine the void volume and it is injected through the injector at two different flow rates 0.3 mL/min and 1.0 mL/min. Once a signal is observed in UV detector, the mobile phase flow through the column is stopped. The results obtained are shown in table 6;

Table S6: Results for void volume determination

| Flow (mL/min) | Marker            | Time (sec) | n | SD   | Volume ( $\mu$ L)<br>Injector + Column<br>– UV cell (a+b+c) | Volume ( $\mu$ L)<br>Injector + Column<br>(a+b+c) - c | Volume of<br>column<br>(a+b) - a |
|---------------|-------------------|------------|---|------|-------------------------------------------------------------|-------------------------------------------------------|----------------------------------|
| 0.30          | NaNO <sub>3</sub> | 51.97      | 5 | 0.86 | 257.84                                                      | 201.14                                                | 175.84                           |

The observed void volume is about 50% of the column volume. Using 0.175 mL as the void volume the linear velocities through the column can be calculated as;

For 0.1 mL/min - 26 mm/min, for 0.05 mL/min – 13.42 mm/min, for 0.012 mL/min – 3.22 mm/min.

[1] F.G. Kondev, Nuclear data sheets for A = 177, Nuclear Data Sheets, 98 (2003) 801- 1095.

[2] Brlcc program package version 2.2b, (2009).

[3] T. Kibédi, T.W. Burrows, M.B. Trzhaskovskaya, P.M. Davidson, C.W. Nestor Jr, Evaluation of theoretical conversion coefficients using Brlcc, Nuclear Instruments and Methods in Physics Research Section A: Accelerators, Spectrometers, Detectors and Associated Equipment, 589 (2008) 202-229.
